# Supplementary material for: Genome-wide identification and expression analysis of the EXO70 gene family in grape (Vitis vinifera L)
Source: PeerJ. 2021 Apr 21;9:e11176. doi: 10.7717/peerj.11176 (PMC8067907; doi:10.7717/peerj.11176)
Supplement: Supplemental Information 10 [file peerj-09-11176-s010.xls]

## Sheet: 12h
GAPDH	CK	26.21	25.31	24.36
	ABA	23.2	23.1	22.68
	SA	35.14	33.26	35.78
	H2O2	25.73	25.6	25.43
	ET	28.39	28.14	27.77
	MeJA	35.75	34.84	36.91
	PEG6000	32.85	33.67	33.78
	4℃	33.8	31.78	32.09
VvEXO70-1	CK	35.9	36.79	35.01
	ABA	35.26	35.15	35.32
	SA	30.76	32.8	32.55
	H2O2	31.78	33.12	32.47
	ET	33.26	31.57	34.02
	MeJA	33.52	34.74	33.87
	PEG6000	34.07	35.35	34.65
	4℃	32.01	33.45	32.94
VvEXO70-2	CK	28.58	28.52	28.91
	ABA	27.34	27.17	27.46
	SA	34.05	32	32.91
	H2O2	29.76	30.56	29.75
	ET	34.49	34.46	34.61
	MeJA	34.42	34.77	34.13
	PEG6000	34.87	33.01	34.21
	4℃	35.65	34.85	38.03
VvEXO70-3	CK	29.95	29.57	30.21
	ABA	31.13	29.62	30.41
	SA	33.32	34.11	32.87
	H2O2	32.38	32.4	31.42
	ET	36.38	36.49	36.51
	MeJA	35.69	35.47	35.25
	PEG6000	33.99	32.65	33.13
	4℃	36.34	36.28	36.49
VvEXO70-4	CK	27.79	27.4	27.41
	ABA	28.86	28.8	28.92
	SA	34.29	33.24	33.86
	H2O2	31.84	31.17	30.62
	ET	35.43	34.62	35.12
	MeJA	33.89	34.37	35.54
	PEG6000	36.81	36.52	35.86
	4℃	36.11	36.35	35.99
VvEXO70-5	CK	33.78	32.56	25.23
	ABA	31.21	32.58	31.85
	SA	34.02	33.23	31.62
	H2O2	33.66	34.24	32.99
	ET	34.73	34.67	34.5
	MeJA	35.46	32.69	33.72
	PEG6000	36.02	37.87	36.44
	4℃	25.28	25.5	25.72
VvEXO70-6	CK	29.47	28.95	29.34
	ABA	28.34	27.92	28.21
	SA	33.98	31.79	33.8
	H2O2	32.63	33.34	32.63
	ET	33.97	35.91	36.12
	MeJA	33.72	34.01	34.55
	PEG6000	34.11	33.59	34.5
	4℃	36.38	32.56	33.65
VvEXO70-7	CK	32.9	33.14	33.26
	ABA	25.39	25.75	25.53
	SA	33.09	32.37	35.27
	H2O2	27.83	28.19	28.26
	ET	31.13	32.48	30.83
	MeJA	34.93	34.32	35.46
	PEG6000	33.25	34.15	32.11
	4℃	30.69	31.01	29.83
VvEXO70-8	CK	34.5	30.61	31.18
	ABA	30.43	28.86	30.3
	SA	31.88	33.02	32.23
	H2O2	29.98	30.43	29.96
	ET	36.64	37.46	35.4
	MeJA	34.29	36.28	33.19
	PEG6000	35.58	33.95	34.78
	4℃	37.3	33.31	33.94
VvEXO70-9	CK	33.56	33.3	33.02
	ABA	32.03	34.48	32.35
	SA	32.03	32.1	32.2
	H2O2	33.29	32.98	33.69
	ET	34.25	33.98	35.12
	MeJA	34.64	34.65	34.68
	PEG6000	34.17	32.83	34.11
	4℃	33.54	33.97	33.26
VvEXO70-10	CK	36.81	36.66	37.52
	ABA	31.2	32.15	33.75
	SA	31.13	32.15	31.06
	H2O2	32.79	31.72	31.98
	ET	35.03	36.72	38.11
	MeJA	39.32	35.54	33.89
	PEG6000	33.2	32.52	32.55
	4℃	35.89	34.75	35.1
VvEXO70-11	CK	34.98	33.3	34.04
	ABA	29.15	29.23	28.98
	SA	34.54	29.96	33.25
	H2O2	29.28	34.72	29.23
	ET	35.82	36.05	36.37
	MeJA	35.22	34.39	36.3
	PEG6000	32.85	34.94	34.27
	4℃	37.63	34.98	35.41
VvEXO70-12	CK	28.76	28.97	28.33
	ABA	28.93	30.69	29.17
	SA	33.06	30.14	32.52
	H2O2	29.14	31.73	29.04
	ET	34.35	35.68	34.54
	MeJA	35.27	34.93	35.48
	PEG6000	32.63	33.56	32.25
	4℃	35.83	32.09	35.11
VvEXO70-13	CK	26.39	26.98	26.06
	ABA	28.47	29.1	27.97
	SA	33.03	30.01	32.72
	H2O2	28.29	28.86	28.57
	ET	35.34	34.51	35.18
	MeJA	33.75	32.41	34.4
	PEG6000	35.62	32.98	32.89
	4℃	35.97	29.14	36.33
VvEXO70-14	CK	26.87	28.15	27.67
	ABA	29.78	30.43	29.14
	SA	33.84	29.94	32.46
	H2O2	35.49	30.22	29
	ET	35.07	32.01	36.53
	MeJA	34.86	32.54	35.87
	PEG6000	33.89	33.19	33.63
	4℃	37.64	31.81	34.75

## Sheet: 24h
GAPDH	24-CK	26.21	25.31	24.36
	24-ABA	25.79	25.64	25.83
	24-SA	23	23.03	23.12
	24-H2O2	31.66	31.86	34.16
	24-ET	32.77	31.96	32.72
	24-MeJA	25.39	25.05	25.64
	24-PEG6000	25.07	25.26	25.19
	24-4℃	25.51	25.52	25.57
VvEXO70-01	24-CK	35.9	36.79	35.01
	24-ABA	37.21	36.81	37.57
	24-SA	29.33	29.34	29.41
	24-H2O2	32.6	32.33	32.45
	24-ET	34.15	32.69	33.67
	24-MeJA	35.76	36.36	35.09
	24-PEG6000	34.59	35.14	34.22
	24-4℃	30.04	29.15	28.45
VvEXO70-02	24-CK	28.58	28.52	28.91
	24-ABA	29.23	29.02	28.76
	24-SA	29.04	29.78	29.2
	24-H2O2	30.54	30.55	30.64
	24-ET	34.89	34.42	35.5
	24-MeJA	34.5	33.85	35.48
	24-PEG6000	37.27	35.46	35.32
	24-4℃	31.12	29.81	30.08
VvEXO70-03	24-CK	29.95	29.57	30.21
	24-ABA	31.48	31.64	31.61
	24-SA	29.49	29.76	30.31
	24-H2O2	32.84	32.37	32.33
	24-ET	36.38	36.43	36.78
	24-MeJA	35.28	33.07	33.84
	24-PEG6000	34.76	35.55	36.16
	24-4℃	34.09	33.21	32.59
VvEXO70-04	24-CK	27.79	27.4	27.41
	24-ABA	29.86	29.56	30.08
	24-SA	30.23	30.56	30.69
	24-H2O2	29.87	30.38	30.59
	24-ET	36.19	34.8	35.26
	24-MeJA	33.06	35.03	34.35
	24-PEG6000	32.35	32.17	33.07
	24-4℃	30.67	30.6	30.74
VvEXO70-05	24-CK	33.78	32.56	25.23
	24-ABA	34.25	33.37	29.85
	24-SA	30.63	29.11	28.29
	24-H2O2	35.33	33.95	35.83
	24-ET	33.67	36.66	36.16
	24-MeJA	35.48	34.18	35.78
	24-PEG6000	34.02	36.45	35.38
	24-4℃	33.49	34.27	35.9
VvEXO70-06	24-CK	29.47	28.95	29.34
	24-ABA	30.14	30.17	29.74
	24-SA	29.42	29.97	29.76
	24-H2O2	31.95	32.62	32.56
	24-ET	38.78	36.18	36.26
	24-MeJA	32.03	31.86	32.49
	24-PEG6000	34.29	32.74	32.83
	24-4℃	31.51	30.56	30.8
VvEXO70-07	24-CK	32.9	33.14	33.26
	24-ABA	27.05	26.72	26.95
	24-SA	28.84	28.71	29.13
	24-H2O2	26.81	26.88	26.73
	24-ET	35.74	35.41	35.02
	24-MeJA	30.12	29.91	29.71
	24-PEG6000	30.88	30.94	31.67
	24-4℃	29.57	29.33	29.23
VvEXO70-08	24-CK	34.5	30.61	31.18
	24-ABA	31.4	27.3	32.13
	24-SA	29.3	29.31	29.82
	24-H2O2	33.95	34.79	36.89
	24-ET	34.42	35.98	36.4
	24-MeJA	32.9	32.59	36.31
	24-PEG6000	32.89	34.25	35.13
	24-4℃	31.64	31.35	32.2
VvEXO70-09	24-CK	33.56	33.3	33.02
	24-ABA	35.4	35.81	35.1
	24-SA	29.25	29.1	29.28
	24-H2O2	35.31	32.79	33.77
	24-ET	35.1	35.64	34.97
	24-MeJA	34.28	31.89	33.01
	24-PEG6000	33.56	31.28	30.99
	24-4℃	30.31	32.45	31.59
VvEXO70-10	24-CK	36.81	36.66	37.52
	24-ABA	37.93	37.04	35.92
	24-SA	29.13	28.85	28.98
	24-H2O2	35.93	34.33	36.04
	24-ET	37.6	35.63	34.17
	24-MeJA	33.93	35.18	33.48
	24-PEG6000	35.73	35.79	35.76
	24-4℃	39.02	37.1	39.19
VvEXO70-11	24-CK	34.98	33.3	34.04
	24-ABA	33.34	34.61	35.47
	24-SA	29.92	29.96	30.14
	24-H2O2	35.29	34.72	35.08
	24-ET	36.06	36.05	36.03
	24-MeJA	36.45	34.39	36.95
	24-PEG6000	33.46	34.94	34.04
	24-4℃	36.59	34.98	34.18
VvEXO70-12	24-CK	28.76	28.97	28.33
	24-ABA	31.46	30.69	30.77
	24-SA	29.75	30.14	30.72
	24-H2O2	31.14	31.73	30.97
	24-ET	35.97	35.68	35.71
	24-MeJA	32.53	34.93	32.46
	24-PEG6000	32.95	33.56	36.37
	24-4℃	31.92	32.09	31.06
VvEXO70-13	24-CK	26.39	26.98	26.06
	24-ABA	29.27	29.1	29.37
	24-SA	29.57	30.01	29.6
	24-H2O2	28.64	28.86	28.95
	24-ET	34.96	34.51	35.56
	24-MeJA	32.36	32.41	31.92
	24-PEG6000	33.48	32.98	33.71
	24-4℃	29.68	29.14	29.6
VvEXO70-14	24-CK	26.87	28.15	27.67
	24-ABA	30.34	30.43	30.4
	24-SA	29.84	29.94	30.51
	24-H2O2	30.05	30.22	30.41
	24-ET	35.12	32.01	32.84
	24-MeJA	32.96	32.54	32.57
	24-PEG6000	34.16	33.19	33.23
	24-4℃	32.08	31.81	30.76
